# Supplementary material for: The effects of early-life growth hormone intervention on tissue specific histone H3 modifications in long-lived Ames dwarf mice
Source: PubMed Central journal article supplement (PMC7880366; doi:10.18632/aging.202451), 2020-12-28
Supplement: aging-13-202451-s001.pdf [file aging-13-202451-s001.pdf]

**SUPPLEMENTARY FIGURES**

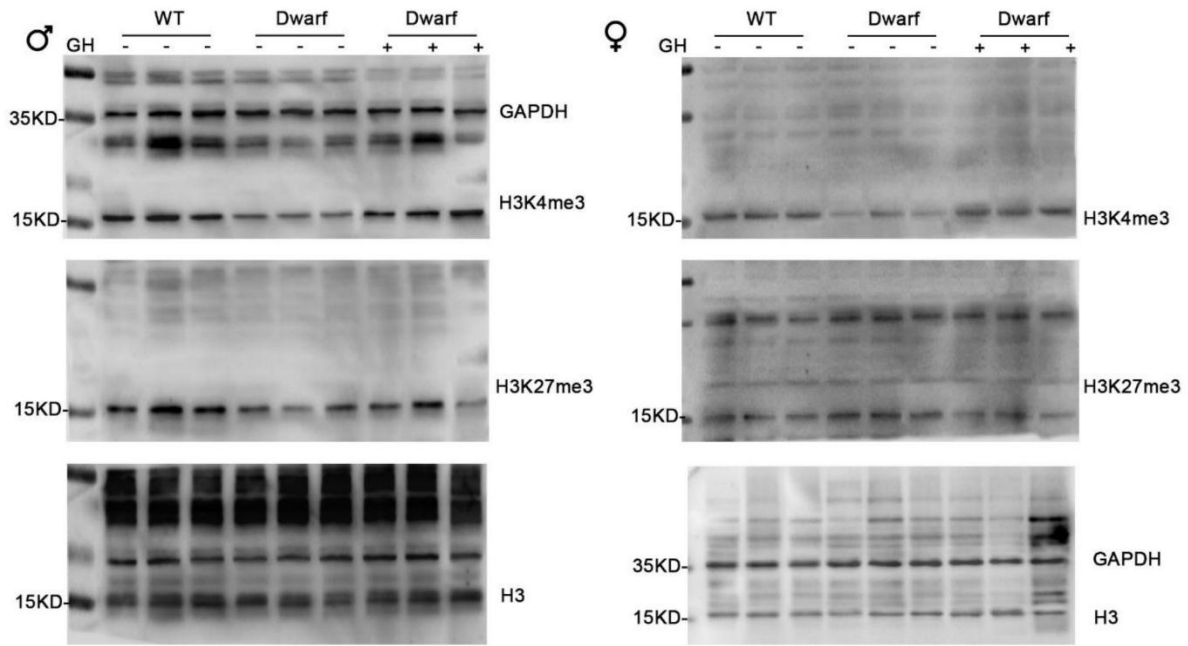

**Supplementary Figure 1. Impact of early life GH intervention on hepatic expressions of H3 methylation on lysine 4 and 9 in Ames dwarf mice.** Representative western blots in males (left) and females (right).

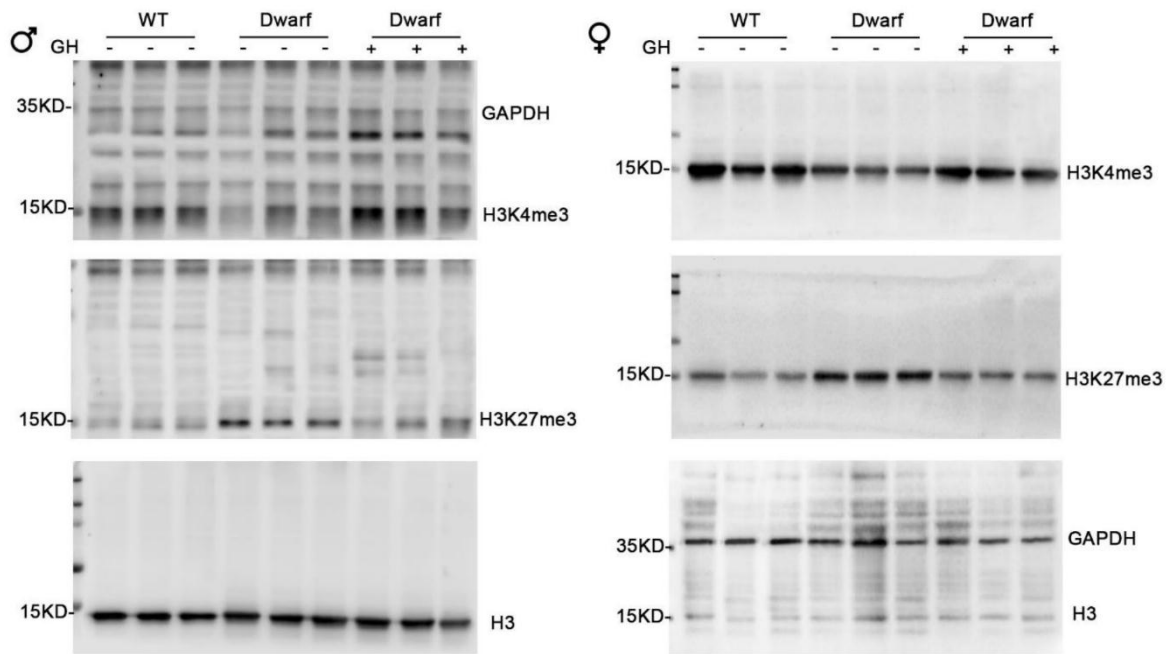

**Supplementary Figure 2. Early-life GH intervention effects brain expression of H3 methylation on lysine 4 and 27 in Ames dwarf mice.** Representative western blots in males (left) and females (right).

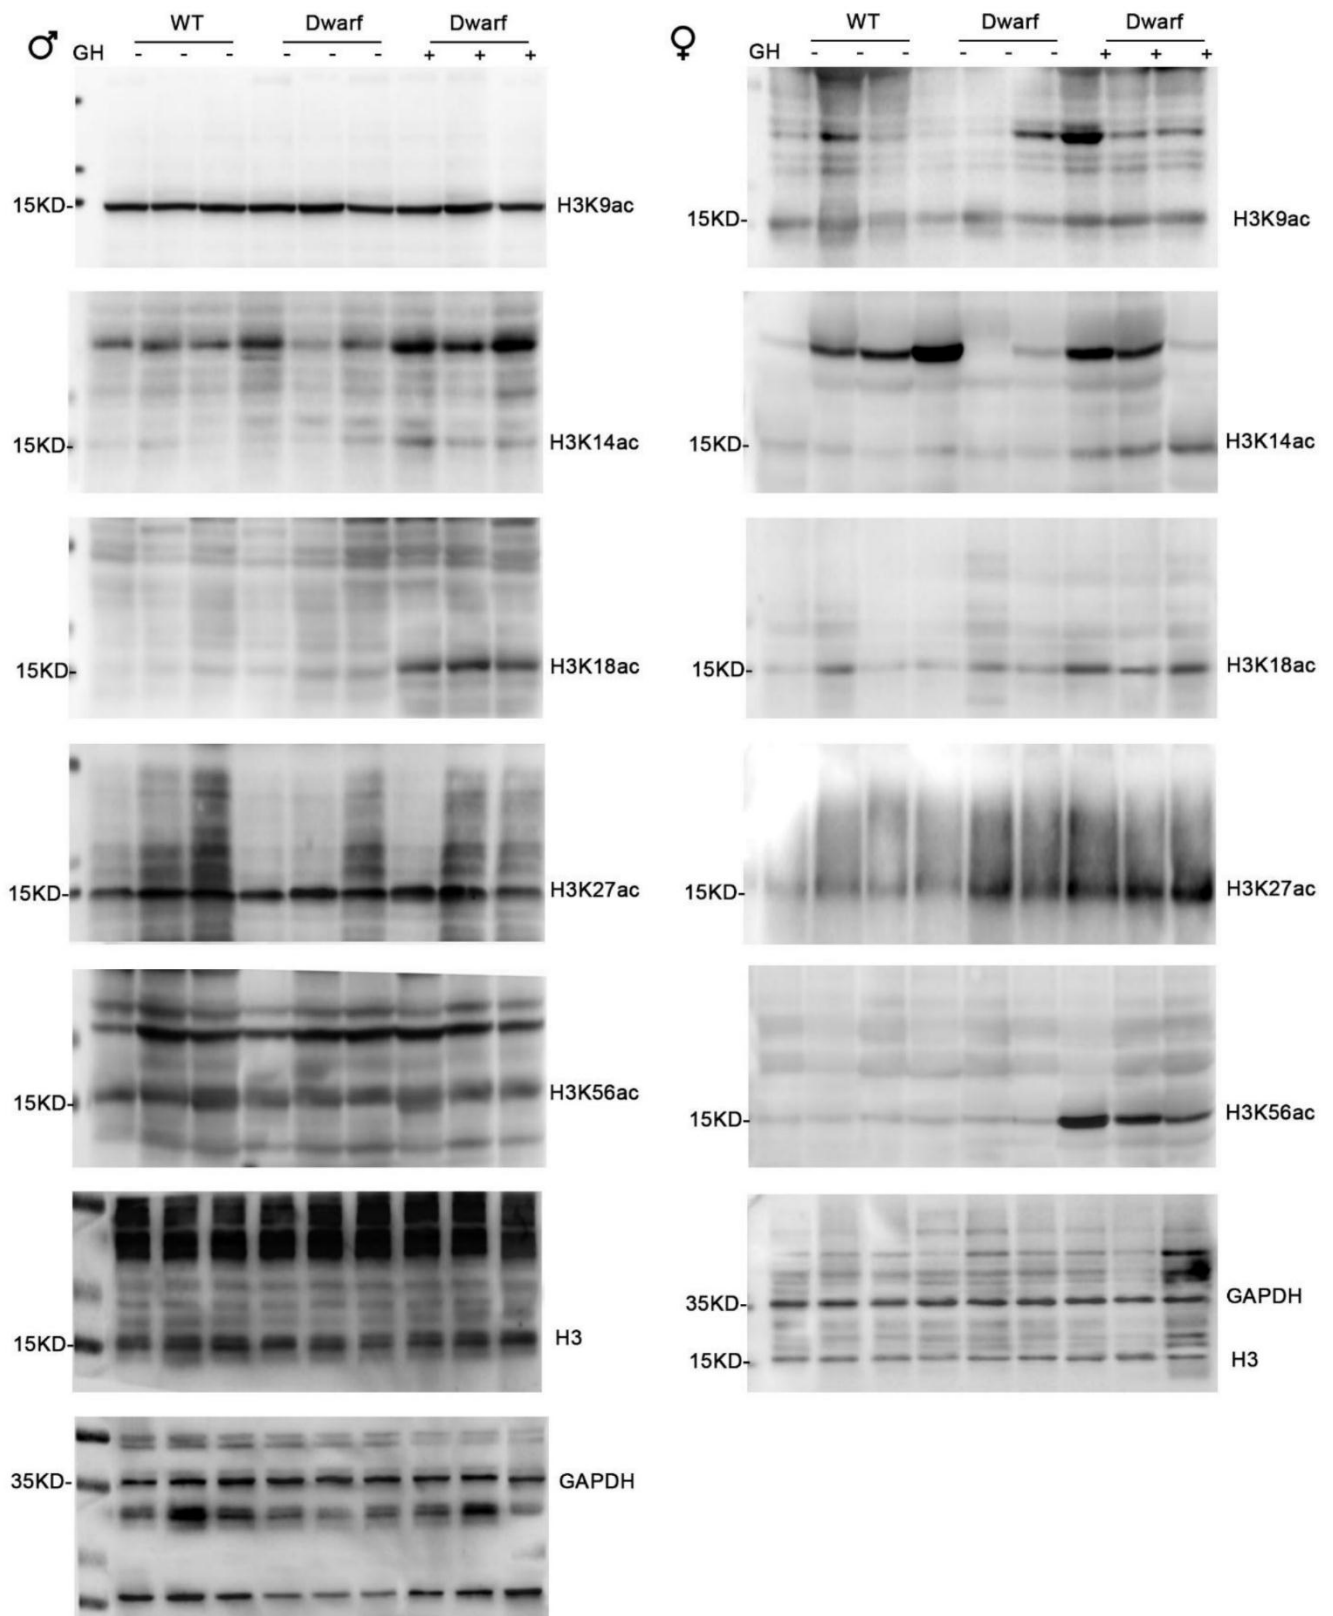

**Supplementary Figure 3. Hepatic histone H3 acetylation changes in Ames dwarf mice upon early-life GH intervention.** Representative western blots in males (left) and females (right).

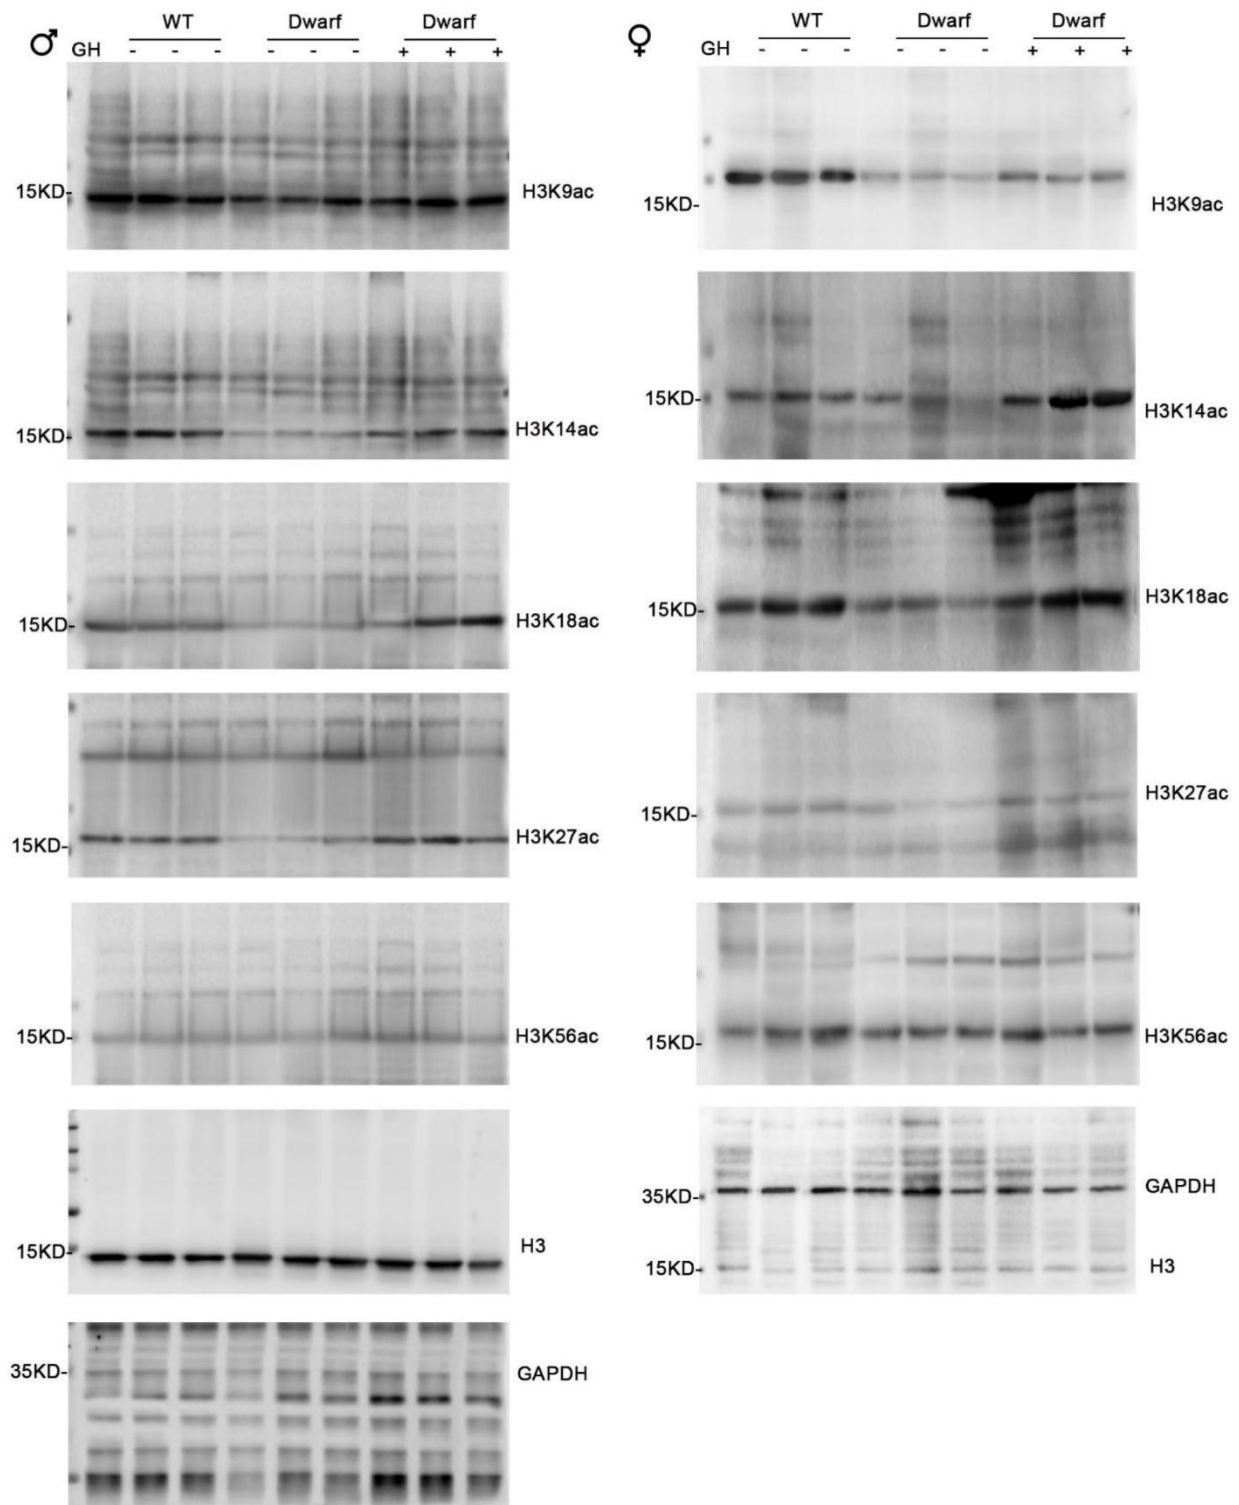

**Supplementary Figure 4. Brain histone H3 acetylation altered in Ames dwarf mice upon early-life GH intervention.** Representative western blots in males (left) and females (right).

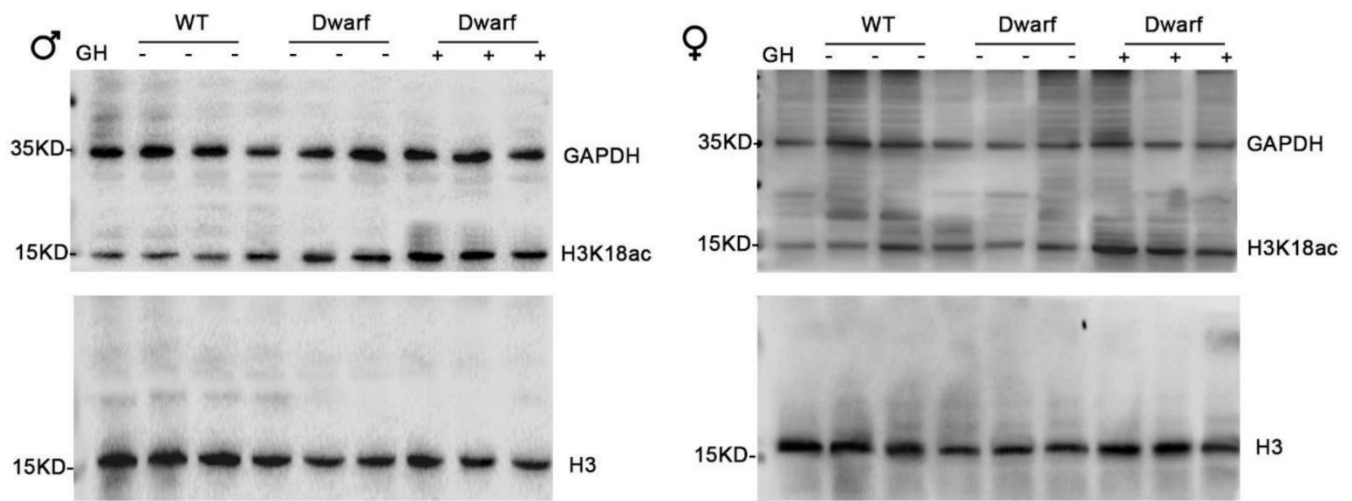

**Supplementary Figure 5. Histone H3 acetylation changes in visceral adipose tissue of Ames dwarf mice upon GH intervention at early age.** Representative western blots in males (left) and females (right).

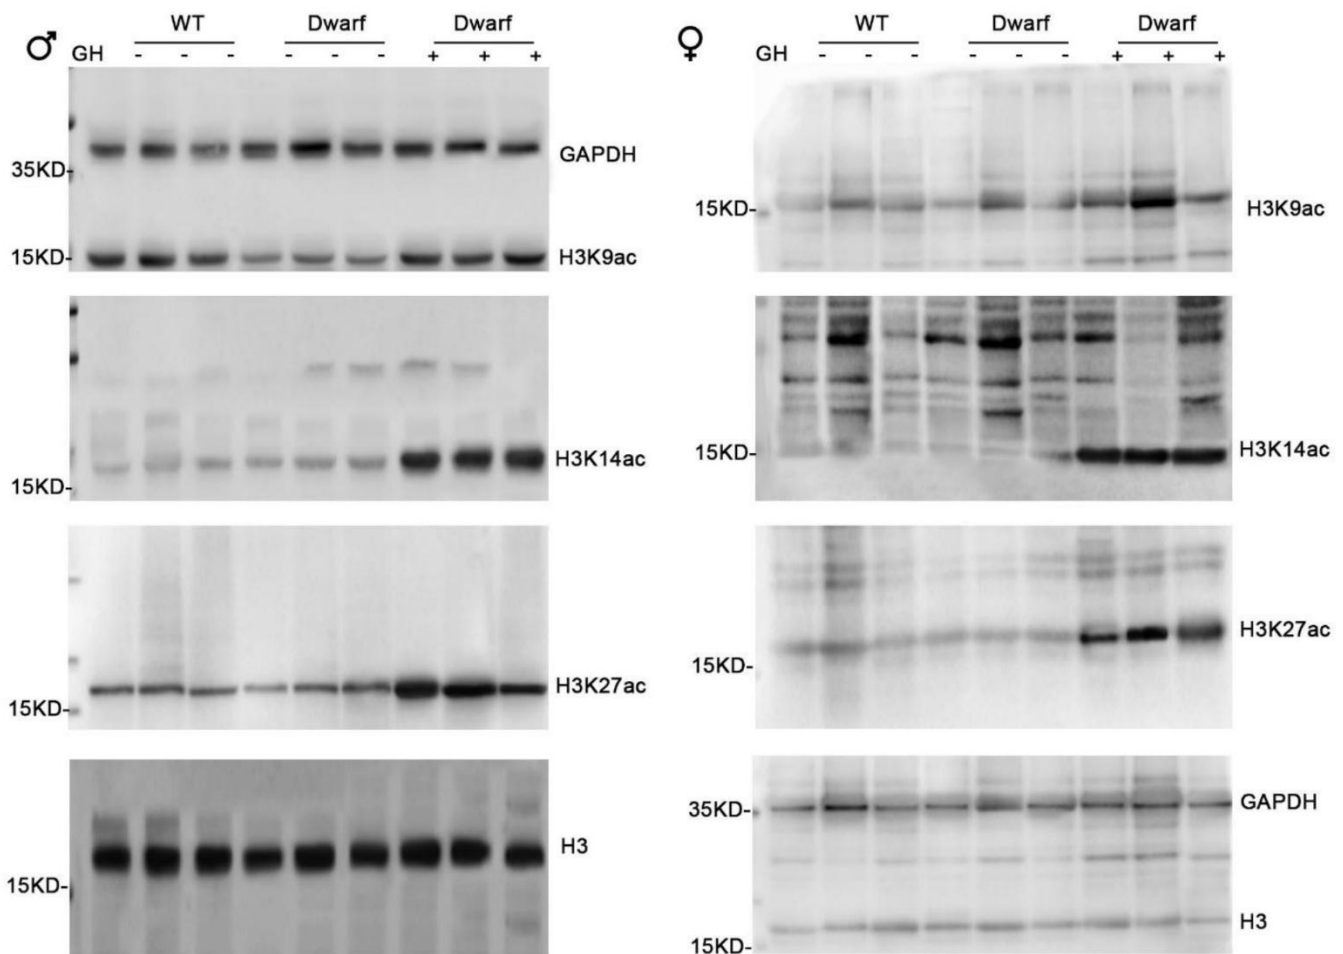

**Supplementary Figure 6. Histone H3 acetylation changes in subcutaneous adipose tissue of Ames dwarf mice upon GH intervention at early age.** Representative western blots in males (left) and females (right).
